# Supplementary material for: <em>Arabidopsis</em> Leaf Chloroplasts Have a Specific Sphingolipidome
Source: Preprints.org preprint supplement (doi:10.20944/preprints202312.0844.v1), 2023-12-12
Supplement: Supplementary file 1 [file supplementary]

## Sheet: LCBs
Supplementary Table. Sphingolipid profile of long chain bases (LCBs) in chloroplast and total leaf (TL) samples from Arabidopsis plants
	Absolute content			Relative content
Species	Chloroplast	TL		Chloroplast	TL
	nmol / mg protein	nmol / g DW		mol %	mol %
t18:0	0.608 ± 0.054	1.591 ± 0.058		11.291 ± 0.371	41.528 ± 1.316
t18:1	4.165 ± 0.399	1.718 ± 0.045		76.590 ± 1.650	44.945 ± 1.291
d18:1	0.490 ± 0.036	0.184 ± 0.011		9.701 ± 1.194	4.797 ± 0.289
d18:0	0.122 ± 0.008	0.335 ± 0.021		2.419 ± 0.297	8.730 ± 0.495
Data are means ± SE (n = 9)
DW, dry weight
ND, not detected

## Sheet: Cers
Supplementary Table. Sphingolipid profile of ceramides (Cers) in chloroplast and total leaf (TL) samples from Arabidopsis plants
	Absolute content			Relative content
Species	Chloroplast	TL		Chloroplast	TL
	nmol / mg protein	nmol / g DW		mol %	mol %
t18:0 c16:0	0.166 ± 0.016	0.444 ± 0.027		6.373 ± 0.599	3.074 ± 0.258
t18:0 c18:0	ND	ND		ND	ND
t18:0 c20:0	0.012 ± 0.000	0.015 ± 0.001		0.471 ± 0.034	0.102 ± 0.011
t18:0 c20:1	ND	ND		ND	ND
t18:0 c22:0	0.016 ± 0.002	0.475 ± 0.028		0.597 ± 0.033	3.224 ± 0.136
t18:0 c22:1	ND	0.002 ± 0.000		ND	0.017 ± 0.001
t18:0 c24:0	0.207 ± 0.025	0.226 ± 0.015		7.481 ± 0.496	1.551 ± 0.122
t18:0 c24:1	0.193 ± 0.015	1.026 ± 0.054		7.165 ± 0.099	6.977 ± 0.288
t18:0 c26:0	0.189 ± 0.020	1.276 ± 0.077		6.904 ± 0.311	8.679 ± 0.430
t18:0 c26:1	0.038 ± 0.006	0.027 ± 0.003		1.347 ± 0.115	0.184 ± 0.025
t18:1 c16:0	0.332 ± 0.018	1.548 ± 0.047		12.583 ± 0.365	10.559 ± 0.275
t18:1 c18:0	ND	0.005 ± 0.000		ND	0.036 ± 0.002
t18:1 c20:0	0.002 ± 0.000	0.086 ± 0.005		0.063 ± 0.003	0.585 ± 0.021
t18:1 c20:1	0.039 ± 0.002	0.002 ± 0.000		1.498 ± 0.100	0.014 ± 0.002
t18:1 c22:0	0.058 ± 0.004	0.242 ± 0.013		2.159 ± 0.047	1.631 ± 0.043
t18:1 c22:1	ND	0.013 ± 0.001		ND	0.089 ± 0.005
t18:1 c24:0	0.544 ± 0.037	3.601 ± 0.176		20.429 ± 0.476	24.400 ± 0.579
t18:1 c24:1	0.133 ± 0.008	1.373 ± 0.104		5.023 ± 0.189	9.299 ± 0.537
t18:1 c26:0	0.585 ± 0.051	3.242 ± 0.230		21.649 ± 0.284	21.897 ± 1.191
t18:1 c26:1	0.083 ± 0.011	0.370 ± 0.024		2.967 ± 0.264	2.531 ± 0.169
d18:0 c16:0	0.023 ± 0.002	0.236 ± 0.013		0.901 ± 0.070	1.635 ± 0.137
d18:0 c18:0	ND	0.011 ± 0.000		ND	0.078 ± 0.003
d18:0 c20:0	ND	0.01ND.001		ND	0.071 ± 0.004
d18:0 c20:1	ND	ND		ND	ND
d18:0 c22:0	ND	ND		ND	ND
d18:0 c22:1	ND	ND		ND	ND
d18:0 c24:0	0.006 ± 0.000	0.043 ± 0.004		0.234 ± 0.007	0.287 ± 0.017
d18:0 c24:1	ND	ND		ND	ND
d18:0 c26:0	0.002 ± 0.000	0.019 ± 0.002		0.070 ± 0.004	0.126 ± 0.010
d18:0 c26:1	ND	ND		ND	ND
d18:1 c16:0	0.037 ± 0.002	0.072 ± 0.004		1.415 ± 0.054	0.486 ± 0.019
d18:1 c18:0	ND	0.167 ± 0.008		ND	1.139 ± 0.045
d18:1 c20:0	0.003 ± 0.000	0.018 ± 0.001		0.115 ± 0.008	0.122 ± 0.004
d18:1 c20:1	ND	ND		ND	ND
d18:1 c22:0	ND	0.016 ± 0.001		ND	0.112 ± 0.007
d18:1 c22:1	ND	ND		ND	ND
d18:1 c24:0	0.004 ± 0.001	0.006 ± 0.000		0.151 ± 0.014	0.039 ± 0.003
d18:1 c24:1	0.003 ± 0.000	0.070 ± 0.006		0.105 ± 0.008	0.471 ± 0.030
d18:1 c26:0	0.005 ± 0.000	0.074 ± 0.005		0.204 ± 0.006	0.499 ± 0.024
d18:1 c26:1	0.002 ± 0.000	0.013 ± 0.001		0.094 ± 0.005	0.089 ± 0.006
Data are means ± SE (n = 9)
DW, dry weight
ND, not detected

## Sheet: hCers
Supplementary Table. Sphingolipid profile of hydroxyceramides (hCers) in chloroplast and total leaf (TL) samples from Arabidopsis plants
	Absolute content			Relative content
Species	Chloroplast	TL		Chloroplast	TL
	nmol / mg protein	nmol / g DW		mol %	mol %
t18:0 h16:0	0.031 ± 0.002	0.021 ± 0.001		0.476 ± 0.012	0.194 ± 0.012
t18:0 h18:0	ND	0.004 ± 0.001		ND	0.038 ± 0.004
t18:0 h20:0	ND	0.013 ± 0.001		ND	0.117 ± 0.006
t18:0 h20:1	ND	ND		ND	ND
t18:0 h22:0	0.039 ± 0.002	0.046 ± 0.002		0.603 ± 0.012	0.408 ± 0.016
t18:0 h22:1	ND	0.002 ± 0.000		ND	0.022 ± 0.003
t18:0 h24:0	0.185 ± 0.011	0.574 ± 0.022		2.839 ± 0.061	5.135 ± 0.156
t18:0 h24:1	0.147 ± 0.009	0.420 ± 0.024		2.269 ± 0.049	3.743 ± 0.146
t18:0 h26:0	0.025 ± 0.002	0.047 ± 0.005		0.385 ± 0.009	0.436 ± 0.060
t18:0 h26:1	0.008 ± 0.001	0.029 ± 0.002		0.122 ± 0.006	0.259 ± 0.015
t18:1 h16:0	1.099 ± 0.067	0.772 ± 0.034		16.886 ± 0.323	6.981 ± 0.428
t18:1 h18:0	0.009 ± 0.001	0.006 ± 0.001		0.145 ± 0.008	0.056 ± 0.006
t18:1 h20:0	0.029 ± 0.002	0.108 ± 0.007		0.455 ± 0.021	0.956 ± 0.033
t18:1 h20:1	ND	0.001 ± 0.000		ND	0.012 ± 0.002
t18:1 h22:0	0.425 ± 0.022	0.089 ± 0.006		6.635 ± 0.328	0.796 ± 0.052
t18:1 h22:1	ND	0.019 ± 0.001		ND	0.166 ± 0.009
t18:1 h24:0	1.347 ± 0.134	3.693 ± 0.263		20.16 ± 0.905	32.700 ± 1.415
t18:1 h24:1	1.765 ± 0.101	2.999 ± 0.250		27.21 ± 0.545	26.429 ± 1.232
t18:1 h26:0	0.386 ± 0.043	0.101 ± 0.007		5.759 ± 0.359	0.909 ± 0.061
t18:1 h26:1	0.287 ± 0.019	0.464 ± 0.019		4.385 ± 0.061	4.154 ± 0.144
d18:0 h16:0	0.034 ± 0.002	0.324 ± 0.015		0.529 ± 0.019	2.895 ± 0.085
d18:0 h18:0	ND	ND		ND	ND
d18:0 h20:0	ND	ND		ND	ND
d18:0 h20:1	ND	0.005 ± 0.000		ND	0.046 ± 0.003
d18:0 h22:0	0.001 ± 0.000	0.007 ± 0.001		0.022 ± 0.001	0.065 ± 0.005
d18:0 h22:1	0.002 ± 0.000	0.008 ± 0.001		0.032 ± 0.003	0.069 ± 0.004
d18:0 h24:0	0.004 ± 0.000	0.006 ± 0.002		0.066 ± 0.003	0.055 ± 0.013
d18:0 h24:1	0.003 ± 0.000	0.019 ± 0.001		0.042 ± 0.002	0.168 ± 0.005
d18:0 h26:0	0.001 ± 0.000	0.007 ± 0.001		0.016 ± 0.001	0.062 ± 0.002
d18:0 h26:1	0.016 ± 0.001	0.022 ± 0.001		0.244 ± 0.010	0.194 ± 0.010
d18:1 h16:0	0.354 ± 0.030	0.132 ± 0.006		5.531 ± 0.453	1.188 ± 0.068
d18:1 h18:0	0.006 ± 0.000	0.037 ± 0.002		0.100 ± 0.007	0.337 ± 0.018
d18:1 h20:0	ND	0.013 ± 0.002		ND	0.113 ± 0.008
d18:1 h20:1	0.032 ± 0.002	ND		0.487 ± 0.016	ND
d18:1 h22:0	ND	ND		ND	ND
d18:1 h22:1	ND	0.187 ± 0.019		ND	1.641 ± 0.113
d18:1 h24:0	0.146 ± 0.011	0.813 ± 0.047		2.230 ± 0.035	7.261 ± 0.320
d18:1 h24:1	0.037 ± 0.003	0.033 ± 0.003		0.559 ± 0.011	0.289 ± 0.017
d18:1 h26:0	0.040 ± 0.002	0.167 ± 0.012		0.612 ± 0.022	1.483 ± 0.062
d18:1 h26:1	0.079 ± 0.007	0.068 ± 0.007		1.199 ± 0.034	0.622 ± 0.071
Data are means ± SE (n = 9)
DW, dry weight
ND, not detected

## Sheet: GlcCers
Supplementary Table. Sphingolipid profile of glucosylceramides (GlcCers) in chloroplast and total leaf (TL) samples from Arabidopsis plants
	Absolute content			Relative content
Species	Chloroplast	TL		Chloroplast	TL
	nmol / mg protein	nmol / g DW		mol %	mol %
t18:0 h16:0	0.007 ± 0.000	0.038 ± 0.002		0.126 ± 0.004	0.085 ± 0.004
t18:0 h18:0	ND	0.004 ± 0.000		ND	0.009 ± 0.000
t18:0 h20:0	ND	0.006 ± 0.000		ND	0.014 ± 0.001
t18:0 h20:1	ND	ND		ND	ND
t18:0 h22:0	ND	0.125 ± 0.006		ND	0.277 ± 0.009
t18:0 h22:1	ND	0.005 ± 0.000		ND	0.011 ± 0.001
t18:0 h24:0	0.022 ± 0.001	0.094 ± 0.006		0.386 ± 0.016	0.207 ± 0.012
t18:0 h24:1	0.014 ± 0.001	0.445 ± 0.010		0.252 ± 0.014	0.987 ± 0.015
t18:0 h26:0	0.014 ± 0.001	0.087 ± 0.003		0.251 ± 0.014	0.193 ± 0.006
t18:0 h26:1	0.006 ± 0.001	0.035 ± 0.001		0.114 ± 0.009	0.079 ± 0.002
t18:1 h16:0	1.560 ± 0.078	4.680 ± 0.133		27.370 ± 0.506	10.405 ± 0.330
t18:1 h18:0	0.011 ± 0.000	0.062 ± 0.002		0.189 ± 0.004	0.138 ± 0.005
t18:1 h20:0	0.023 ± 0.001	0.225 ± 0.004		0.399 ± 0.007	0.499 ± 0.006
t18:1 h20:1	ND	0.009 ± 0.000		ND	0.020 ± 0.001
t18:1 h22:0	0.046 ± 0.002	4.329 ± 0.173		0.810 ± 0.028	9.588 ± 0.275
t18:1 h22:1	0.012 ± 0.001	0.142 ± 0.005		0.210 ± 0.007	0.313 ± 0.007
t18:1 h24:0	0.888 ± 0.032	3.809 ± 0.196		15.663 ± 0.333	8.446 ± 0.402
t18:1 h24:1	0.588 ± 0.015	17.805 ± 0.407		10.430 ± 0.321	39.509 ± 0.593
t18:1 h26:0	0.375 ± 0.019	2.604 ± 0.051		6.588 ± 0.170	5.778 ± 0.056
t18:1 h26:1	0.174 ± 0.007	1.025 ± 0.020		3.070 ± 0.034	2.280 ± 0.054
d18:0 h16:0	0.019 ± 0.001	0.343 ± 0.007		0.347 ± 0.021	0.763 ± 0.016
d18:0 h18:0	ND	ND		ND	ND
d18:0 h20:0	ND	ND		ND	ND
d18:0 h20:1	ND	ND		ND	ND
d18:0 h22:0	ND	ND		ND	ND
d18:0 h22:1	ND	0.024 ± 0.001		ND	0.054 ± 0.002
d18:0 h24:0	ND	0.011 ± 0.001		ND	0.023 ± 0.002
d18:0 h24:1	ND	ND		ND	ND
d18:0 h26:0	ND	0.018 ± 0.001		ND	0.041 ± 0.002
d18:0 h26:1	ND	ND		ND	ND
d18:1 h16:0	1.699 ± 0.075	7.519 ± 0.154		29.870 ± 0.367	16.688 ± 0.212
d18:1 h18:0	ND	0.014 ± 0.001		ND	0.031 ± 0.001
d18:1 h20:0	ND	0.031 ± 0.002		ND	0.068 ± 0.003
d18:1 h20:1	ND	ND		ND	ND
d18:1 h22:0	0.019 ± 0.001	0.282 ± 0.014		0.331 ± 0.022	0.624 ± 0.026
d18:1 h22:1	ND	0.012 ± 0.001		ND	0.026 ± 0.002
d18:1 h24:0	0.072 ± 0.005	0.594 ± 0.041		1.259 ± 0.050	1.309 ± 0.070
d18:1 h24:1	0.090 ± 0.003	0.504 ± 0.020		1.596 ± 0.046	1.120 ± 0.049
d18:1 h26:0	0.027 ± 0.002	0.035 ± 0.002		0.476 ± 0.021	0.078 ± 0.005
d18:1 h26:1	0.015 ± 0.001	0.151 ± 0.005		0.265 ± 0.017	0.334 ± 0.008
Data are means ± SE (n = 9)
DW, dry weight
ND, not detected

## Sheet: GIPCs
Supplementary Table. Sphingolipid profile of glycosylinositolphosphoceramides (GIPCs) in chloroplast and total leaf (TL) samples from Arabidopsis plants
	Absolute content			Relative content
Species	Chloroplast	TL		Chloroplast	TL
	nmol / mg protein	nmol / g DW		mol %	mol %
t18:0 h16:0	0.138 ± 0.006	5.556 ± 0.146		0.474 ± 0.016	2.092 ± 0.057
t18:0 h18:0	ND	ND		ND	ND
t18:0 h20:0	ND	ND		ND	ND
t18:0 h20:1	ND	ND		ND	ND
t18:0 h22:0	0.265 ± 0.008	4.299 ± 0.079		0.912 ± 0.021	1.620 ± 0.040
t18:0 h22:1	ND	ND		ND	ND
t18:0 h24:0	0.898 ± 0.032	9.500 ± 0.580		3.079 ± 0.055	3.564 ± 0.192
t18:0 h24:1	1.703 ± 0.043	18.923 ± 0.709		5.851 ± 0.040	7.088 ± 0.087
t18:0 h26:0	0.305 ± 0.012	2.194 ± 0.257		1.051 ± 0.040	0.813 ± 0.089
t18:0 h26:1	0.241 ± 0.014	1.902 ± 0.142		0.824 ± 0.037	0.716 ± 0.055
t18:1 h16:0	1.352 ± 0.027	34.108 ± 1.564		4.650 ± 0.053	12.770 ± 0.307
t18:1 h18:0	ND	ND		ND	ND
t18:1 h20:0	0.109 ± 0.004	1.484 ± 0.102		0.376 ± 0.010	0.552 ± 0.025
t18:1 h20:1	ND	ND		ND	ND
t18:1 h22:0	1.641 ± 0.034	17.317 ± 0.527		5.642 ± 0.046	6.499 ± 0.096
t18:1 h22:1	ND	ND		ND	ND
t18:1 h24:0	9.046 ± 0.183	53.717 ± 2.291		31.094 ± 0.060	20.089 ± 0.357
t18:1 h24:1	5.704 ± 0.116	49.435 ± 1.955		19.607 ± 0.086	18.502 ± 0.235
t18:1 h26:0	3.625 ± 0.062	14.334 ± 1.237		12.467 ± 0.084	5.335 ± 0.394
t18:1 h26:1	0.896 ± 0.019	6.219 ± 0.649		3.081 ± 0.025	2.298 ± 0.192
d18:0 h16:0	0.220 ± 0.007	7.482 ± 0.163		0.757 ± 0.025	2.817 ± 0.066
d18:0 h18:0	ND	ND		ND	ND
d18:0 h20:0	ND	ND		ND	ND
d18:0 h20:1	ND	ND		ND	ND
d18:0 h22:0	0.060 ± 0.005	0.456 ± 0.029		0.206 ± 0.016	0.170 ± 0.007
d18:0 h22:1	ND	ND		ND	ND
d18:0 h24:0	0.865 ± 0.022	7.709 ± 0.312		2.974 ± 0.054	2.899 ± 0.111
d18:0 h24:1	0.249 ± 0.011	2.499 ± 0.117		0.856 ± 0.030	0.936 ± 0.029
d18:0 h26:0	0.477 ± 0.016	1.561 ± 0.142		1.640 ± 0.047	0.582 ± 0.042
d18:0 h26:1	ND	ND		ND	ND
d18:1 h16:0	1.295 ± 0.035	28.297 ± 0.608		4.459 ± 0.108	10.657 ± 0.266
d18:1 h18:0	ND	ND		ND	ND
d18:1 h20:0	ND	ND		ND	ND
d18:1 h20:1	ND	ND		ND	ND
d18:1 h22:0	ND	ND		ND	ND
d18:1 h22:1	ND	ND		ND	ND
d18:1 h24:0	ND	ND		ND	ND
d18:1 h24:1	ND	ND		ND	ND
d18:1 h26:0	ND	ND		ND	ND
d18:1 h26:1	ND	ND		ND	ND
Data are means ± SE (n = 9)
DW, dry weight
ND, not detected
